# Supplementary material for: Lone-Pair-Induced Structural Ordering in the Mixed-Valent 0D Metal-Halides Rb23BiIIIxSbIII7–xSbV2Cl54 (0 ≤ x ≤ 7)
Source: PubMed Central journal article supplement — Chem Mater. 2021 Mar 23;33(7):2408–19. doi: 10.1021/acs.chemmater.0c04491 (PMC8043103; doi:10.1021/acs.chemmater.0c04491), 2021-03-23
Supplement: cm0c04491_si_006.pdf [file cm0c04491_si_006.pdf]

## Supplementary Information

### Lone-Pair-Induced Structural Ordering in the Mixed-Valent $\alpha$ D Metal-Halides $\text{Rb}_{23}\text{Bi}^{\text{III}}\text{Sb}^{\text{III}}_{7-x}\text{Sb}^{\text{V}}_2\text{Cl}_{54}$ ( $0 \leq x \leq 7$ )

Bogdan M. Benin,<sup>†,‡,#</sup> Kyle M. McCall,<sup>†,‡,#</sup> Michael Wörle,<sup>†</sup> Dominique Borgeaud,<sup>†</sup> Thomas Vonderach,<sup>†</sup> Kostiantyn Sakhatskyi,<sup>†,‡</sup> Sergii Yakunin,<sup>†,‡</sup> Detlef Günther,<sup>†</sup> Maksym V. Kovalenko<sup>\*,†,‡</sup>

<sup>†</sup>Laboratory of Inorganic Chemistry, Department of Chemistry and Applied Biosciences, ETH Zürich, Vladimir-Prelog-Weg 1, CH-8093 Zürich, Switzerland

<sup>‡</sup>Laboratory for Thin Films and Photovoltaics, Empa – Swiss Federal Laboratories for Materials Science and Technology, Überlandstrasse 129, CH-8600 Dübendorf, Switzerland

# - these authors contributed equally

**Table S1. Reported resistivities for mixed-valent  $\text{A}_4\text{M}^{\text{III}}\text{M}^{\text{V}}\text{X}_{12}$  materials.**

| Composition                                                                | $R$ ( $\Omega\text{cm}$ ) | Ref.      |
|----------------------------------------------------------------------------|---------------------------|-----------|
| $\text{Rb}_{23}\text{Bi}^{\text{III}}\text{Sb}^{\text{V}}_2\text{Cl}_{54}$ | $1.0 \times 10^{10}$      | This work |
| $\text{Cs}_8\text{Sb}^{\text{III}}\text{Sb}^{\text{V}}\text{Cl}_{12}$      | $2.74 \times 10^{11}$     | [5]       |
| $\text{Rb}_4\text{Sb}^{\text{III}}\text{Sb}^{\text{V}}\text{Cl}_{12}$      | $3.3 \times 10^{12}$      | [5]       |
| $\text{Cs}_4\text{Bi}^{\text{III}}\text{Sb}^{\text{V}}\text{Cl}_{12}$      | $6.06 \times 10^{14}$     | [5]       |
| $\text{Cs}_4\text{In}^{\text{III}}\text{Sb}^{\text{V}}\text{Cl}_{12}$      | $1.06 \times 10^{15}$     | [5]       |
| $(\text{NH}_4)_4\text{Sb}^{\text{III}}\text{Sb}^{\text{V}}\text{Br}_{12}$  | $1 \times 10^7$           | [6]       |

#### Note S1: Detailed description of ICPMS experiment.

All the preparation steps were done gravimetrically using a Mettler Toledo AT400 balance. The solid samples (approximately 100 mg) were transferred into PTFE digestion vials. A mixture of concentrated  $\text{HNO}_3$  (1 mL), ultrapure  $\text{HCl}$  (3 mL) and Ho recovery standard (1 mL of 1 mg  $\text{L}^{-1}$  stock solution) was then added to all digestion vials including the digestion blanks. A microwave-assisted digestion was carried out using a turboWave (MLS GmbH, Germany) microwave system. The samples were digested while holding a temperature of 240 °C (1200 W) at 120 bar for 20 minutes (after ramp-up time). After cooling to room temperature, the clear and colourless solutions were transferred into TPP 50 mL centrifuge tubes and diluted to 50 mL using ultrapure water. The sample solutions were further diluted by a factor of  $5 \times 10^5$  using an aqueous solution of 1%  $\text{HNO}_3$  and 1%  $\text{HCl}$ . A stock solution of Ir (internal standard) was added in order to obtain a concentration of 2  $\mu\text{g L}^{-1}$  in every sample.

The analysis was carried out using a sector-field inductively coupled plasma mass spectrometer (Element XR, ThermoFisher, Bremen, Germany). The solutions were introduced using a micro concentric nebulizer (200  $\mu\text{L min}^{-1}$ , borosilicate glass, glass expansion) combined with a cyclonic spray chamber (borosilicate glass, glass expansion), quartz injector, torch with guard electrode, sampler and skimmer made of nickel. A 1  $\mu\text{g L}^{-1}$  tuning solution containing Rb, In, Sb and Bi was used to obtain maximum signal intensities and a flat-top peak shape. The oxide formation ratio for  $\text{CeO/Ce}$  and  $\text{UO/U}$  was estimated to be as low as 3% and 5%, respectively. Further instrumental parameters were adjusted as follows: a nebulizer gas flow of 1.06  $\text{L min}^{-1}$ , a Plasma gas flow of 16  $\text{L min}^{-1}$ , an auxiliary gas flow of 1  $\text{L min}^{-1}$ , and a power of 1350 W. The faraday, analogue, and counting detector modes were cross-calibrated using the Faraday-Cross Calibration sequence provided by the manufacturer.

The isotopes  $^{85}\text{Rb}$ ,  $^{115}\text{In}$ ,  $^{121}\text{Sb}$ ,  $^{165}\text{Ho}$ ,  $^{209}\text{Bi}$  were measured in the low resolution ( $m/\Delta m = 300$ ) mode using the e-scan mode. 6 runs and 6 passes were performed yielding a total measurement time of approximately 2 min per sample.

An external calibration was carried out. Six calibration solutions were measured containing 0, 0.2, 0.5, 1.5, 2.5, and 4  $\mu\text{g L}^{-1}$  of Rb ICP reference standard; 0, 0.2, 0.5, 1.0, 1.5, and 2  $\mu\text{g L}^{-1}$  of In, Sb and Bi ICP reference standards; and 0, 10, 20, 40, 60, and 80  $\text{ng L}^{-1}$  of Ho ICP reference standard. A linear regression was conducted to fit the calibration curves.

The limits of detection (LODs) for Rb, In, Sb and Bi were determined to be 19.5  $\text{ng L}^{-1}$ , 2.4  $\text{ng L}^{-1}$ , 12.7  $\text{ng L}^{-1}$  and 0.7  $\text{ng L}^{-1}$ , respectively. In order to validate the method and exclude any matrix effects, some samples

were spiked with Rb, In, Sb, Bi ICP reference standards. A spike consisting of approximately 100% of the original content of the corresponding analyte in the sample was added. Recoveries between 94 to 109%

**Table S2. Crystal data and structure refinement for Rb<sub>23</sub>Sb<sub>9</sub>Cl<sub>54</sub> at 293(2) K.**

| Empirical formula              | Rb <sub>23</sub> Sb <sub>9</sub> Cl <sub>54</sub>                                    |
|--------------------------------|--------------------------------------------------------------------------------------|
| Formula weight                 | 4975.86                                                                              |
| Temperature                    | 293(2) K                                                                             |
| Wavelength                     | 0.71073 Å                                                                            |
| Crystal system                 | Orthorhombic                                                                         |
| Space group                    | <i>Cmcm</i>                                                                          |
| Unit cell dimensions           | a = 22.3435(7) Å, α = 90°<br>b = 12.9057(4) Å, β = 90°<br>c = 37.0625(13) Å, γ = 90° |
| Volume                         | 10687.3(6) Å <sup>3</sup>                                                            |
| Z                              | 4                                                                                    |
| Density (calculated)           | 3.093 g/cm <sup>3</sup>                                                              |
| Absorption coefficient         | 14.016 mm <sup>-1</sup>                                                              |
| F(000)                         | 8912                                                                                 |
| Crystal size                   | 0.075 x 0.07 x 0.02 mm <sup>3</sup>                                                  |
| \q range for data collection   | 1.648 to 27.102°                                                                     |
| Index ranges                   | -28<=h<=28, -16<=k<=16, -47<=l<=44                                                   |
| Reflections collected          | 56777                                                                                |
| Independent reflections        | 6429 [R <sub>int</sub> = 0.0971]                                                     |
| Completeness to θ = 25.242°    | 100%                                                                                 |
| Refinement method              | Full-matrix least-squares on F <sup>2</sup>                                          |
| Data / restraints / parameters | 6429 / 0 / 217                                                                       |
| Goodness-of-fit                | 1.191                                                                                |
| Final R indices [I > 2σ(I)]    | R <sub>obs</sub> = 0.1322, wR <sub>obs</sub> = 0.3133                                |
| R indices [all data]           | R <sub>all</sub> = 0.1521, wR <sub>all</sub> = 0.3279                                |
| Largest diff. peak and hole    | 5.088 and -1.183 e·Å <sup>-3</sup>                                                   |
| Twin law BASF coefficient      | 0.242(4)                                                                             |
| Twin law matrix                | [0.5, 1.5, 0; 0.5, -0.5, 0; 0, 0, -1]                                                |

$$R = \frac{\sum ||F_o| - |F_c||}{\sum |F_o|}, wR = \frac{\{\sum [w(|F_o|^2 - |F_c|^2)^2] / \sum [w(|F_o|^4)]\}^{1/2}}{\text{and } w=1/[\sigma^2(F_o^2) + (0.1570P)^2 + 473.2945P]} \text{ where } P = (F_o^2 + 2F_c^2)/3$$

**Table S3. Atomic coordinates ( $\times 10^4$ ) and equivalent isotropic displacement parameters ( $\text{\AA}^2 \times 10^3$ ) for  $\text{Rb}_{23}\text{Sb}_9\text{Cl}_{54}$  at 293(2) K with estimated standard deviations in parentheses.**

| Label  | x       | y        | z       | Occupancy | $U_{\text{eq}}^*$ |
|--------|---------|----------|---------|-----------|-------------------|
| Sb(1)  | 5000    | 9977(2)  | 7500    | 1         | 37(1)             |
| Sb(2)  | 3341(1) | 5008(2)  | 7500    | 1         | 37(1)             |
| Sb(3)  | 3324(1) | 1653(2)  | 5800(1) | 1         | 41(1)             |
| Sb(4)  | 5000    | 6683(2)  | 5716(1) | 1         | 46(1)             |
| Rb(1)  | 5000    | 13788(3) | 8146(1) | 1         | 47(1)             |
| Rb(2)  | 5000    | 10230(4) | 8819(2) | 1         | 69(2)             |
| Rb(3)  | 5000    | 6665(5)  | 7500    | 1         | 64(2)             |
| Rb(4)  | 1443(1) | 3106(2)  | 6850(1) | 1         | 48(1)             |
| Rb(5)  | 3333(2) | 1664(3)  | 6906(1) | 1         | 58(1)             |
| Rb(6)  | 3207(2) | 4852(3)  | 6178(1) | 1         | 72(1)             |
| Rb(7)  | 1735(2) | 3400(3)  | 5397(1) | 1         | 75(1)             |
| Rb(8)  | 5000    | 3166(4)  | 5481(2) | 1         | 74(2)             |
| Cl(1)  | 5000    | 11323(8) | 7999(3) | 1         | 70(3)             |
| Cl(2)  | 5000    | 8559(7)  | 8064(3) | 1         | 58(2)             |
| Cl(3)  | 3809(4) | 9898(7)  | 7500    | 1         | 52(2)             |
| Cl(4)  | 4048(3) | 5708(5)  | 8059(2) | 1         | 55(2)             |
| Cl(5)  | 2783(4) | 6817(7)  | 7500    | 1         | 53(2)             |
| Cl(6)  | 3986(4) | 3279(7)  | 7500    | 1         | 52(2)             |
| Cl(7)  | 2674(3) | 4343(7)  | 7002(2) | 1         | 67(2)             |
| Cl(8)  | 2382(3) | 2343(6)  | 6222(2) | 1         | 60(2)             |
| Cl(9)  | 4145(3) | 2739(7)  | 6230(2) | 1         | 67(2)             |
| Cl(10) | 3454(4) | -88(6)   | 6223(2) | 1         | 64(2)             |
| Cl(11) | 2544(3) | 794(6)   | 5412(2) | 1         | 60(2)             |
| Cl(12) | 3280(4) | 3229(6)  | 5403(3) | 1         | 71(2)             |
| Cl(13) | 4147(3) | 915(6)   | 5411(2) | 1         | 58(2)             |
| Cl(14) | 4255(5) | 5943(11) | 5350(3) | 1         | 103(4)            |
| Cl(15) | 5000    | 5205(11) | 6072(4) | 1         | 117(7)            |
| Cl(16) | 5751(5) | 7444(10) | 6072(3) | 1         | 106(4)            |
| Cl(17) | 5000    | 8175(11) | 5351(4) | 1         | 106(6)            |

\* $U_{\text{eq}}$  is defined as one third of the trace of the orthogonalized  $U_{ij}$  tensor.

**Table S4. Anisotropic displacement parameters ( $\text{\AA}^2 \times 10^3$ ) for  $\text{Rb}_{23}\text{Sb}_9\text{Cl}_{54}$  at 293(2) K with estimated standard deviations in parentheses.**

| Label | $U_{11}$ | $U_{22}$ | $U_{33}$ | $U_{12}$ | $U_{13}$ | $U_{23}$ |
|-------|----------|----------|----------|----------|----------|----------|
| Sb(1) | 39(2)    | 28(2)    | 45(2)    | 0        | 0        | 0        |
| Sb(2) | 38(1)    | 30(2)    | 42(2)    | -2(1)    | 0        | 0        |
| Sb(3) | 38(1)    | 34(1)    | 49(1)    | 2(1)     | 2(1)     | -2(1)    |
| Sb(4) | 47(2)    | 38(2)    | 54(2)    | 0        | 0        | -3(2)    |
| Rb(1) | 41(2)    | 36(2)    | 65(2)    | 0        | 0        | 2(2)     |
| Rb(2) | 55(2)    | 84(3)    | 70(3)    | 0        | 0        | -3(2)    |
| Rb(3) | 65(3)    | 50(3)    | 77(3)    | 0        | 0        | 0        |
| Rb(4) | 43(2)    | 41(2)    | 61(2)    | 4(1)     | 3(1)     | 2(2)     |
| Rb(5) | 60(2)    | 59(2)    | 55(2)    | 5(2)     | -1(2)    | 1(2)     |
| Rb(6) | 83(2)    | 63(2)    | 68(2)    | 18(2)    | -3(2)    | 1(2)     |
| Rb(7) | 73(2)    | 70(2)    | 82(2)    | -12(2)   | 1(2)     | -1(2)    |
| Rb(8) | 89(3)    | 68(3)    | 66(2)    | 0        | 0        | -1(2)    |
| Cl(1) | 96(8)    | 42(5)    | 72(7)    | 0        | 0        | -10(5)   |
| Cl(2) | 52(5)    | 39(5)    | 84(7)    | 0        | 0        | 7(4)     |
| Cl(3) | 27(4)    | 55(5)    | 73(6)    | -3(3)    | 0        | 0        |

|        |         |        |        |        |        |        |
|--------|---------|--------|--------|--------|--------|--------|
| Cl(4)  | 43(3)   | 48(3)  | 75(4)  | 0(3)   | -8(3)  | -4(3)  |
| Cl(5)  | 53(5)   | 41(4)  | 66(6)  | -1(4)  | 0      | 0      |
| Cl(6)  | 50(4)   | 39(4)  | 67(6)  | 2(4)   | 0      | 0      |
| Cl(7)  | 57(4)   | 79(5)  | 66(4)  | -23(4) | -6(3)  | -10(4) |
| Cl(8)  | 42(3)   | 64(4)  | 74(5)  | 7(3)   | 4(3)   | -10(4) |
| Cl(9)  | 65(4)   | 71(5)  | 64(4)  | -22(4) | -5(3)  | -4(4)  |
| Cl(10) | 78(4)   | 43(3)  | 73(5)  | -2(3)  | 5(4)   | 13(3)  |
| Cl(11) | 55(4)   | 66(4)  | 60(4)  | 2(3)   | -12(3) | -9(4)  |
| Cl(12) | 99(6)   | 45(4)  | 70(5)  | 10(4)  | -3(4)  | 18(4)  |
| Cl(13) | 47(3)   | 64(4)  | 64(4)  | 1(3)   | 13(3)  | -9(3)  |
| Cl(14) | 109(8)  | 119(9) | 81(6)  | -42(7) | -23(5) | -17(6) |
| Cl(15) | 220(20) | 53(7)  | 79(10) | 0      | 0      | 17(7)  |
| Cl(16) | 88(7)   | 129(9) | 100(7) | -45(7) | -22(5) | -9(7)  |
| Cl(17) | 194(19) | 49(7)  | 76(9)  | 0      | 0      | 19(6)  |

The anisotropic displacement factor exponent takes the form:  $-2\pi^2[h^2a^*U_{11} + \dots + 2hka^*b^*U_{12}]$ .

**Table S5. Selected bond lengths [ $\text{\AA}$ ] for  $\text{Rb}_{23}\text{Sb}_9\text{Cl}_{54}$  at 293(2) K with estimated standard deviations in parentheses.**

| Label        | Distances |
|--------------|-----------|
| Sb(1)-Cl(1)  | 2.537(11) |
| Sb(1)-Cl(2)  | 2.777(11) |
| Sb(1)-Cl(3)  | 2.664(8)  |
| Sb(2)-Cl(4)  | 2.757(7)  |
| Sb(2)-Cl(5)  | 2.647(10) |
| Sb(2)-Cl(6)  | 2.656(9)  |
| Sb(2)-Cl(7)  | 2.521(7)  |
| Sb(3)-Cl(8)  | 2.769(7)  |
| Sb(3)-Cl(9)  | 2.803(7)  |
| Sb(3)-Cl(10) | 2.755(8)  |
| Sb(3)-Cl(11) | 2.518(7)  |
| Sb(3)-Cl(12) | 2.512(8)  |
| Sb(3)-Cl(13) | 2.524(7)  |
| Sb(4)-Cl(14) | 2.349(9)  |
| Sb(4)-Cl(15) | 2.319(14) |
| Sb(4)-Cl(16) | 2.350(9)  |
| Sb(4)-Cl(17) | 2.352(13) |

**Table S6. Results from ICP-MS.**

| Formula <sup>1</sup>                                                    | Expected    |             |             | Measured    |      |             |       |                    |      |
|-------------------------------------------------------------------------|-------------|-------------|-------------|-------------|------|-------------|-------|--------------------|------|
|                                                                         | Rb<br>mass% | Sb<br>mass% | Bi<br>mass% | Rb<br>mass% | Std. | Sb<br>mass% | Std.  | Bi<br>mass%        | Std. |
| RbSbCl <sub>6</sub>                                                     | 20.4        | 28.9        | -           | 20.5        | 0.4  | 27.23       | 0.11  | <LOD <sup>2</sup>  | -    |
| Rb <sub>23</sub> Bi <sub>6.62</sub> Sb <sub>2.38</sub> Cl <sub>54</sub> | 35.4        | 5.2         | 24.9        | 35.2        | 0.7  | 4.08        | 0.03  | 24.7               | 0.6  |
| Rb <sub>23</sub> Bi <sub>7</sub> Sb <sub>2</sub> Cl <sub>54</sub>       | 35.2        | 4.36        | 26.2        | 36          | 0.6  | 4.113       | 0.023 | 25                 | 0.5  |
| Rb <sub>23</sub> Sb <sub>9</sub> Cl <sub>54</sub>                       | 39.5        | 22          | -           | 40.4        | 0.8  | 21.31       | 0.09  | < LOD <sup>2</sup> | -    |

<sup>1</sup>From single-crystal X-ray diffraction.

<sup>2</sup>Limit-of-detection for Bi = 0.02%.

**Table S7. Octahedral antimony sites in Rb<sub>23</sub>Sb<sup>III</sup><sub>7</sub>Sb<sup>V</sup><sub>2</sub>Cl<sub>54</sub> (Cmcm).**

| Site label | Wyckoff site | % Sb | Average bond length, (Å) | Distortion index Δd | Effective Coord. # | Angle variance | Bond valence sum | Distortion   | Valence |
|------------|--------------|------|--------------------------|---------------------|--------------------|----------------|------------------|--------------|---------|
| Sb1        | 4c           | 100  | 2.660                    | 0.031               | 5.650              | 13.683         | 2.692            | Disphenoidal | III     |
| Sb2        | 8g           | 100  | 2.644                    | 0.031               | 5.660              | 14.430         | 2.804            | Disphenoidal | III     |
| Sb3        | 16h          | 100  | 2.647                    | 0.049               | 5.393              | 4.532          | 2.856            | Trigonal     | III     |
| Sb4        | 8f           | 100  | 2.345                    | 0.004               | 5.995              | 0.786          | 5.310            | Undistorted  | V       |

Values for bond lengths, the bond length distortion index Δd, angle variance, bond valence sums, and the effective coordination numbers calculated using the Vesta3 crystallography software.<sup>[3]</sup>

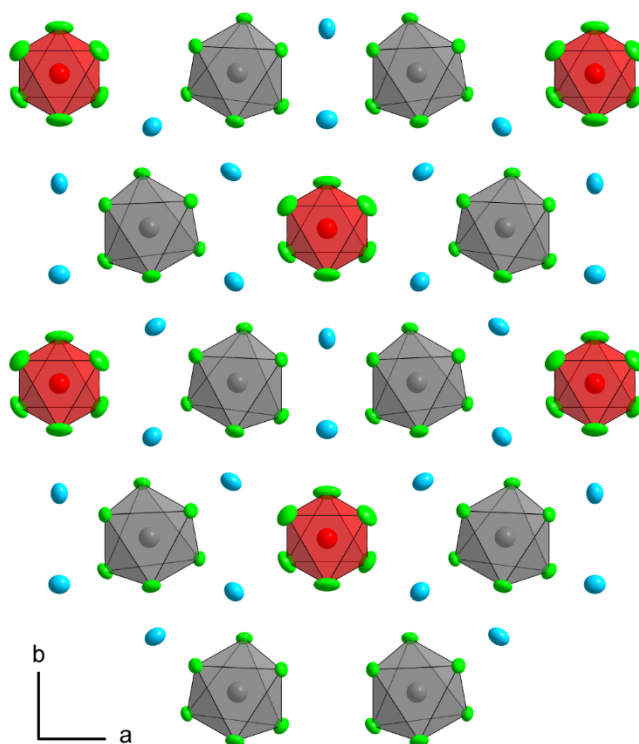

**Figure S1. A view of the mixed-valent layer of Rb<sub>23</sub>Sb<sub>9</sub>Cl<sub>54</sub> along the c-axis.**

| Coordination # | Rb environments in $\text{Rb}_{23}\text{Sb}_9\text{Cl}_{54}$                                                                                                                                                           |
|----------------|------------------------------------------------------------------------------------------------------------------------------------------------------------------------------------------------------------------------|
| 6              | 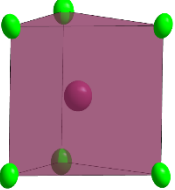 <span style="margin-left: 100px;">Rb3</span>                                                                                         |
| 8              |  <span style="margin-left: 100px;">Rb1</span>      |
| 9              |  <span style="margin-left: 20px;">Rb5</span>                                                                                         |
| 11             |  <span style="margin-left: 100px;">Rb2</span>  |
| 12             |  <span style="margin-left: 100px;">Rb7</span>  |

**Figure S2.  $\text{Rb}^+$  environments in  $\text{Rb}_{23}\text{Sb}_9\text{Cl}_{54}$  colored differently according to coordination number. These colors are applied to the Rb environments in Figure S3.**

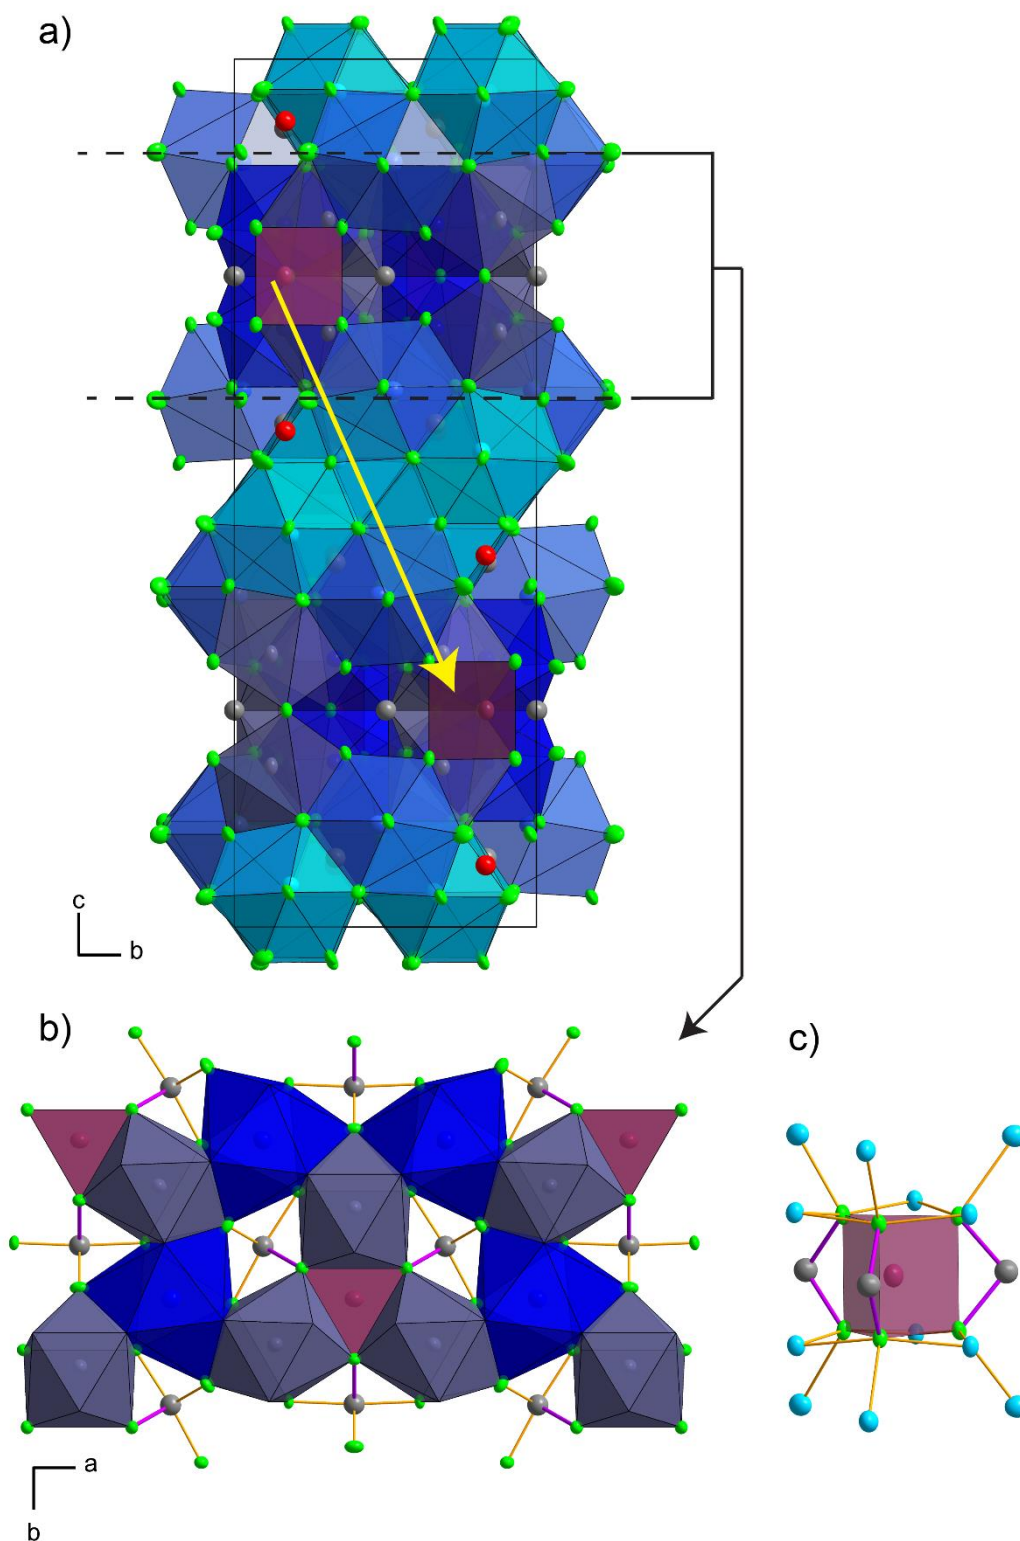

Figure S3. a) The unit cell of  $\text{Rb}_{23}\text{Sb}_9\text{Cl}_{54}$  as viewed along the  $a$ -axis with Rb-polyhedra colored according to their coordination numbers (indicated in Figure S2). The yellow arrow demonstrates the structure directing effect of the 6-coordinate Rb cation ( $\text{Rb}_3$ ). b) A slab of the unit cell (indicated by bracket in subfigure a) viewed along the  $c$ -axis, with purple bonds pointing along the direction of the lone pair. c) The first and second coordination sphere of  $\text{Rb}_3$ .

**Table S8. Summary of  $\text{Rb}_{23}\text{Sb}_9\text{Cl}_{54}$  Rb coordination environments.**

| Site label | Wyckoff site | Avg. bond length (Å) | Min. (Å) | Max. (Å) | Distortion index $\Delta d$ | Effective Coord. # | Coord. # | Coord. Lone Pairs | Slab location |
|------------|--------------|----------------------|----------|----------|-----------------------------|--------------------|----------|-------------------|---------------|
| Rb1        | 8f           | 3.315                | 3.228    | 3.427    | 0.015                       | 7.904              | 8        | -                 | I-II space    |
| Rb2        | 8f           | 3.682                | 3.350    | 4.062    | 0.057                       | 9.032              | 11       | -                 |               |
| Rb3        | 4c           | 3.216                | =        | =        | 0.000                       | 6.000              | 6        | 3 (slab II)       | II cent       |
| Rb4        | 16h          | 3.322                | 3.230    | 3.401    | 0.015                       | 7.909              | 8        | -                 | II edge       |
| Rb5        | 16h          | 3.507                | 3.333    | 3.775    | 0.050                       | 8.046              | 9        | 1 (slab I/III)    | II edge       |
| Rb6        | 16h          | 3.692                | 3.341    | 4.110    | 0.061                       | 8.752              | 11       | -                 | I edge        |
| Rb7        | 16h          | 3.672                | 3.459    | 3.892    | 0.032                       | 11.214             | 12       | -                 | I-I' space    |
| Rb8        | 8f           | 3.650                | 3.416    | 3.981    | 0.052                       | 10.359             | 12       | -                 | I-I' space    |

Values for bond lengths, the bond length distortion index  $\Delta d$  and the effective coordination numbers calculated using the Vesta3 crystallography software.<sup>[3]</sup>

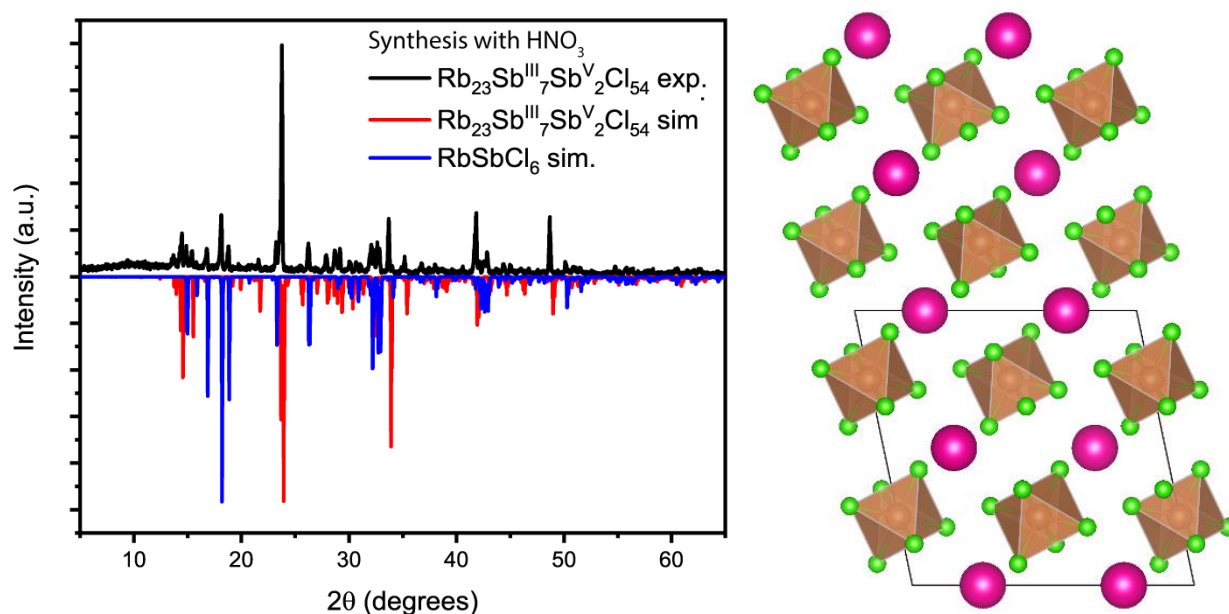

**Figure S4. PXR D of material synthesized with  $\text{HNO}_3$  as the oxidant; Crystal structure of  $\text{RbSbCl}_6$ .**



**Table S9. Crystal data and structure refinement for RbSbCl<sub>6</sub> at 293(2) K**

| Empirical formula              | RbSbCl <sub>6</sub>                                                                        |
|--------------------------------|--------------------------------------------------------------------------------------------|
| Formula weight                 | 419.92                                                                                     |
| Temperature                    | 293(2) K                                                                                   |
| Wavelength                     | 0.71073 Å                                                                                  |
| Crystal system                 | Monoclinic                                                                                 |
| Space group                    | C2/c                                                                                       |
| Unit cell dimensions           | a = 12.0736(4) Å, α = 90°<br>b = 6.3321(2) Å, β = 101.905(3)°<br>c = 12.1366(3) Å, γ = 90° |
| Volume                         | 907.90(5) Å <sup>3</sup>                                                                   |
| Z                              | 4                                                                                          |
| Density (calculated)           | 3.072 g/cm <sup>3</sup>                                                                    |
| Absorption coefficient         | 10.040 mm <sup>-1</sup>                                                                    |
| F(000)                         | 760                                                                                        |
| Crystal size                   | 0.291 x 0.212 x 0.103 mm <sup>3</sup>                                                      |
| θ range for data collection    | 3.431 to 31.495°                                                                           |
| Index ranges                   | -14 ≤ h ≤ 17, -9 ≤ k ≤ 6, -17 ≤ l ≤ 17                                                     |
| Reflections collected          | 5049                                                                                       |
| Independent reflections        | 1504 [R <sub>int</sub> = 0.0275]                                                           |
| Completeness to θ = 25.242°    | 100%                                                                                       |
| Refinement method              | Full-matrix least-squares on F <sup>2</sup>                                                |
| Data / restraints / parameters | 1504 / 0 / 39                                                                              |
| Goodness-of-fit                | 1.043                                                                                      |
| Final R indices [I > 2σ(I)]    | R <sub>obs</sub> = 0.0347, wR <sub>obs</sub> = 0.0907                                      |
| R indices [all data]           | R <sub>all</sub> = 0.0397, wR <sub>all</sub> = 0.0954                                      |
| Largest diff. peak and hole    | 3.230 and -1.062 e·Å <sup>-3</sup>                                                         |

$$R = \frac{\sum ||F_o| - |F_c||}{\sum |F_o|}, wR = \frac{\{\sum [w(|F_o|^2 - |F_c|^2)^2] / \sum [w(|F_o|^4)]\}^{1/2}}{\text{and } w = 1 / [\sigma^2(F_o^2) + (0.0647P)^2 + 1.3476P]} \text{ where } P = (F_o^2 + 2F_c^2) / 3$$

**Table S10. Atomic coordinates (x10<sup>4</sup>) and equivalent isotropic displacement parameters (Å<sup>2</sup>x10<sup>3</sup>) for RbSbCl<sub>6</sub> at 293(2) K with estimated standard deviations in parentheses.**

| Label  | x       | y       | z       | Occupancy | U <sub>eq</sub> <sup>*</sup> |
|--------|---------|---------|---------|-----------|------------------------------|
| Sb(01) | 7500    | 7500    | 5000    | 1         | 22(1)                        |
| Rb(02) | 5000    | 8903(1) | 7500    | 1         | 48(1)                        |
| Cl(03) | 7118(1) | 5846(2) | 6632(1) | 1         | 37(1)                        |
| Cl(04) | 8491(1) | 4452(2) | 4623(1) | 1         | 35(1)                        |
| Cl(05) | 5787(1) | 6142(2) | 3910(1) | 1         | 38(1)                        |

\*U<sub>eq</sub> is defined as one third of the trace of the orthogonalized U<sub>ij</sub> tensor.

**Table S11. Anisotropic displacement parameters (Å<sup>2</sup>x10<sup>3</sup>) for RbSbCl<sub>6</sub> at 293(2) K with estimated standard deviations in parentheses.**

| Label  | U <sub>11</sub> | U <sub>22</sub> | U <sub>33</sub> | U <sub>12</sub> | U <sub>13</sub> | U <sub>23</sub> |
|--------|-----------------|-----------------|-----------------|-----------------|-----------------|-----------------|
| Sb(01) | 23(1)           | 23(1)           | 21(1)           | -1(1)           | 5(1)            | -1(1)           |
| Rb(02) | 48(1)           | 49(1)           | 48(1)           | 0               | 13(1)           | 0               |
| Cl(03) | 46(1)           | 38(1)           | 30(1)           | -2(1)           | 16(1)           | 7(1)            |
| Cl(04) | 39(1)           | 29(1)           | 40(1)           | 6(1)            | 12(1)           | -4(1)           |
| Cl(05) | 29(1)           | 40(1)           | 41(1)           | -6(1)           | -1(1)           | -7(1)           |

The anisotropic displacement factor exponent takes the form:  $-2\pi^2[h^2a^{*2}U_{11} + \dots + 2hka^*b^*U_{12}]$ .

**Table S12.** Select bond lengths [Å] for  $\text{RbSbCl}_6$  at 293(2) K with estimated standard deviations in parentheses.

| Label         | Distances |
|---------------|-----------|
| Sb(o1)-Cl(o3) | 2.3681(8) |
| Sb(o1)-Cl(o4) | 2.3643(9) |
| Sb(o1)-Cl(o5) | 2.3744(8) |

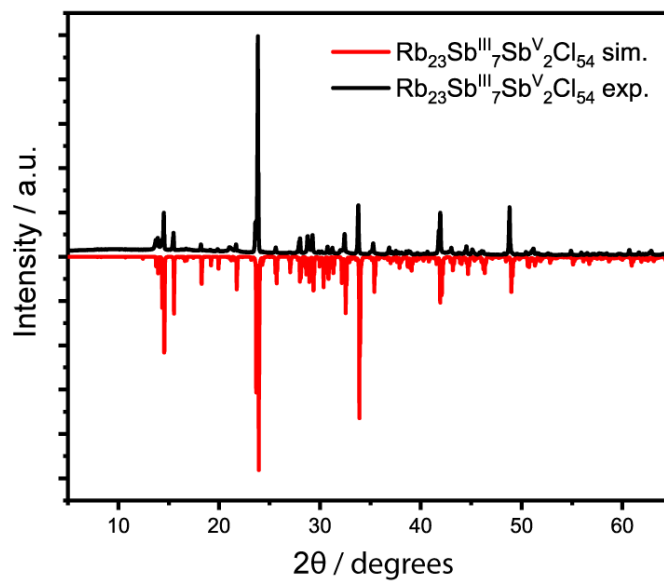

**Figure S5.** PXRD of  $\text{Rb}_{23}\text{Sb}_9\text{Cl}_{54}$  prepared with  $\text{H}_2\text{O}_2$ .

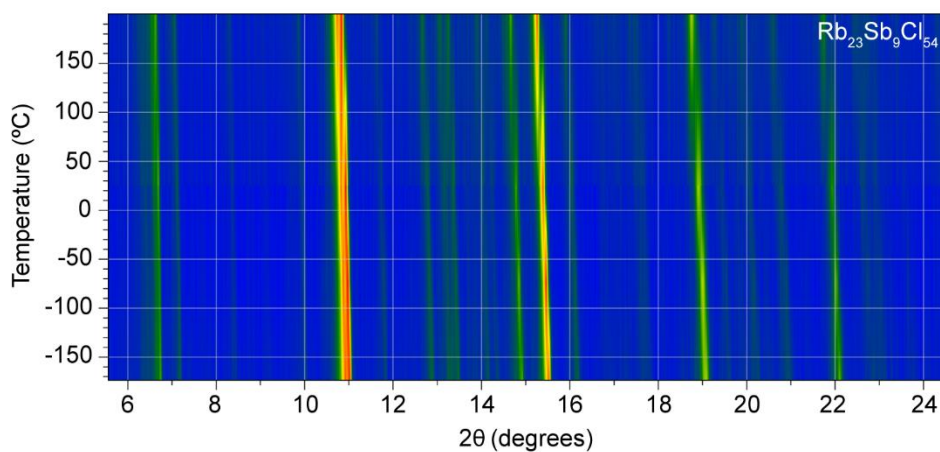

**Figure S6.** Temperature dependent PXRD measured from  $-150\text{ }^\circ\text{C}$  to  $150\text{ }^\circ\text{C}$ .

**Table S13. Crystal data and structure refinement for Rb<sub>23</sub>Bi<sub>2.50</sub>Sb<sub>6.50</sub>Cl<sub>54</sub> at 293(2) K.**

| Empirical formula              | Rb <sub>23</sub> Bi <sub>2.50</sub> Sb <sub>6.50</sub> Cl <sub>54</sub>                    |
|--------------------------------|--------------------------------------------------------------------------------------------|
| Formula weight                 | 5194.28                                                                                    |
| Temperature                    | 293(2) K                                                                                   |
| Wavelength                     | 0.71073 Å                                                                                  |
| Crystal system                 | Trigonal                                                                                   |
| Space group                    | R32                                                                                        |
| Unit cell dimensions           | a = 12.95670(10) Å, α = 90°<br>b = 12.95670(10) Å, β = 90°<br>c = 111.7130(14) Å, γ = 120° |
| Volume                         | 16241.4(3) Å <sup>3</sup>                                                                  |
| Z                              | 6                                                                                          |
| Density (calculated)           | 3.186 g/cm <sup>3</sup>                                                                    |
| Absorption coefficient         | 17.266 mm <sup>-1</sup>                                                                    |
| F(000)                         | 13848                                                                                      |
| Crystal size                   | 0.351 x 0.103 x 0.03 mm <sup>3</sup>                                                       |
| θ range for data collection    | 1.641 to 32.577°                                                                           |
| Index ranges                   | -19 ≤ h ≤ 19, -19 ≤ k ≤ 19, -168 ≤ l ≤ 168                                                 |
| Reflections collected          | 291748                                                                                     |
| Independent reflections        | 13184 [R <sub>int</sub> = 0.1364]                                                          |
| Completeness to θ = 25.242°    | 99.9%                                                                                      |
| Refinement method              | Full-matrix least-squares on F <sup>2</sup>                                                |
| Data / restraints / parameters | 13184 / 0 / 345                                                                            |
| Goodness-of-fit                | 1.095                                                                                      |
| Final R indices [I > 2σ(I)]    | R <sub>obs</sub> = 0.0582, wR <sub>obs</sub> = 0.1029                                      |
| R indices [all data]           | R <sub>all</sub> = 0.0808, wR <sub>all</sub> = 0.1111                                      |
| Largest diff. peak and hole    | 1.963 and -3.740 e·Å <sup>-3</sup>                                                         |

$$R = \frac{\sum ||F_o| - |F_c||}{\sum |F_o|}, wR = \frac{\{\sum [w(|F_o|^2 - |F_c|^2)^2] / \sum [w(|F_o|^4)]\}^{1/2}}{\text{and } w = 1 / [\sigma^2(F_o^2) + (0.0192P)^2 + 481.0651P]} \text{ where } P = (F_o^2 + 2F_c^2) / 3$$

**Table S14. Atomic coordinates (x10<sup>4</sup>) and equivalent isotropic displacement parameters (Å<sup>2</sup>x10<sup>3</sup>) for Rb<sub>23</sub>Bi<sub>2.50</sub>Sb<sub>6.50</sub>Cl<sub>54</sub> at 293(2) K with estimated standard deviations in parentheses.**

| Label  | x        | y       | z       | Occupancy | U <sub>eq</sub> * |
|--------|----------|---------|---------|-----------|-------------------|
| Bi(1)  | 10009(1) | 6666.67 | 6666.67 | 0.551(9)  | 19(1)             |
| Sb(1)  | 10009(1) | 6666.67 | 6666.67 | 0.449(9)  | 19(1)             |
| Bi(2)  | 10000    | 10000   | 6102(1) | 0.255(10) | 22(1)             |
| Sb(2)  | 10000    | 10000   | 6102(1) | 0.745(10) | 22(1)             |
| Bi(3)  | 6666.67  | 3333.33 | 6102(1) | 0.280(10) | 22(1)             |
| Sb(3)  | 6666.67  | 3333.33 | 6102(1) | 0.720(10) | 22(1)             |
| Bi(4)  | 6684(1)  | 6666(1) | 5574(1) | 0.076(7)  | 35(1)             |
| Sb(4)  | 6684(1)  | 6666(1) | 5574(1) | 0.924(7)  | 35(1)             |
| Sb(5)  | 3333.33  | 6666.67 | 6068(1) | 1         | 28(1)             |
| Bi(6)  | 3333(1)  | 3333(1) | 5000    | 0.604(10) | 29(1)             |
| Sb(6)  | 3333(1)  | 3333(1) | 5000    | 0.396(10) | 29(1)             |
| Rb(1)  | 13333.33 | 6666.67 | 6666.67 | 1         | 35(1)             |
| Rb(2)  | 6666.67  | 3333.33 | 6864(1) | 1         | 35(1)             |
| Rb(3)  | 6666.67  | 3333.33 | 6469(1) | 1         | 34(1)             |
| Rb(4)  | 6219(1)  | 6667(1) | 6449(1) | 1         | 21(1)             |
| Rb(5)  | 9718(2)  | 6664(2) | 6224(1) | 1         | 45(1)             |
| Rb(6)  | 6834(2)  | 6661(2) | 5975(1) | 1         | 64(1)             |
| Rb(7)  | 10000    | 10000   | 5705(1) | 1         | 75(2)             |
| Rb(8)  | 6666.67  | 3333.33 | 5706(1) | 1         | 72(1)             |
| Rb(9)  | 3333.33  | 6666.67 | 5669(1) | 1         | 76(2)             |
| Rb(10) | 9984(3)  | 6666(3) | 5443(1) | 1         | 103(2)            |

|        |          |           |         |        |        |
|--------|----------|-----------|---------|--------|--------|
| Rb(11) | 9554(4)  | 9555(4)   | 5218(1) | 0.3333 | 48(2)  |
| Rb(12) | 6663(2)  | 6668(2)   | 5198(1) | 0.6667 | 54(1)  |
| Rb(13) | 6661(5)  | 3775(4)   | 5219(1) | 0.3333 | 48(2)  |
| Rb(14) | 6667(7)  | 6667(7)   | 5000    | 0.3333 | 68(2)  |
| Rb(15) | 6664(5)  | 3781(4)   | 4783(1) | 0.3333 | 47(2)  |
| Cl(1)  | 8914(3)  | 4263(2)   | 6667(1) | 1      | 26(1)  |
| Cl(2)  | 11438(3) | 6666(3)   | 6852(1) | 1      | 26(1)  |
| Cl(3)  | 8662(3)  | 6666(4)   | 6494(1) | 1      | 42(1)  |
| Cl(4)  | 8095(3)  | 8385(3)   | 6242(1) | 1      | 36(1)  |
| Cl(5)  | 9902(4)  | 8339(4)   | 5968(1) | 1      | 45(1)  |
| Cl(6)  | 6387(3)  | 4956(3)   | 6243(1) | 1      | 35(1)  |
| Cl(7)  | 6753(4)  | 1764(4)   | 5968(1) | 1      | 45(1)  |
| Cl(8)  | 4810(6)  | 6663(7)   | 6186(1) | 1      | 95(2)  |
| Cl(9)  | 1870(6)  | 6662(8)   | 5946(1) | 1      | 98(2)  |
| Cl(10) | 5113(6)  | 5088(6)   | 5702(1) | 1      | 75(2)  |
| Cl(11) | 6684(5)  | 8237(6)   | 5704(1) | 1      | 74(2)  |
| Cl(12) | 8268(5)  | 6670(5)   | 5699(1) | 1      | 70(2)  |
| Cl(13) | 4977(8)  | 6658(10)  | 5436(1) | 1      | 144(4) |
| Cl(14) | 6687(9)  | 4982(7)   | 5438(1) | 1      | 130(3) |
| Cl(15) | 8363(8)  | 8347(8)   | 5438(1) | 1      | 129(3) |
| Cl(16) | 8534(11) | 6666(11)  | 5182(2) | 0.3333 | 55(3)  |
| Cl(17) | 7999(14) | 10003(16) | 5170(2) | 0.3333 | 72(4)  |
| Cl(18) | 6663(12) | 8549(12)  | 5184(2) | 0.3333 | 60(3)  |
| Cl(19) | 5334(14) | 8670(14)  | 5169(2) | 0.3333 | 68(4)  |
| Cl(20) | 4780(12) | 4792(12)  | 5182(2) | 0.3333 | 58(3)  |
| Cl(21) | 4663(15) | 3323(18)  | 5169(2) | 0.3333 | 76(5)  |
| Cl(22) | 5730(13) | 4427(11)  | 4999(1) | 0.3333 | 53(3)  |
| Cl(23) | 7622(13) | 5363(12)  | 4999(2) | 0.3333 | 53(3)  |
| Cl(24) | 7955(12) | 8908(12)  | 5000(1) | 0.3333 | 53(3)  |

<sup>†</sup>U<sub>eq</sub> is defined as one third of the trace of the orthogonalized U<sub>ij</sub> tensor.

**Table S15.** Anisotropic displacement parameters ( $\text{\AA}^2 \times 10^3$ ) for  $\text{Rb}_{23}\text{Bi}_{2.50}\text{Sb}_{6.50}\text{Cl}_{54}$  at 293(2) K with estimated standard deviations in parentheses.

| Label | U <sub>11</sub> | U <sub>22</sub> | U <sub>33</sub> | U <sub>12</sub> | U <sub>13</sub> | U <sub>23</sub> |
|-------|-----------------|-----------------|-----------------|-----------------|-----------------|-----------------|
| Bi(1) | 16(1)           | 18(1)           | 24(1)           | 9(1)            | 0(1)            | 0(1)            |
| Sb(1) | 16(1)           | 18(1)           | 24(1)           | 9(1)            | 0(1)            | 0(1)            |
| Bi(2) | 24(1)           | 24(1)           | 19(1)           | 12(1)           | 0               | 0               |
| Sb(2) | 24(1)           | 24(1)           | 19(1)           | 12(1)           | 0               | 0               |
| Bi(3) | 24(1)           | 24(1)           | 17(1)           | 12(1)           | 0               | 0               |
| Sb(3) | 24(1)           | 24(1)           | 17(1)           | 12(1)           | 0               | 0               |
| Bi(4) | 28(1)           | 29(1)           | 49(1)           | 14(1)           | 1(1)            | 0(1)            |
| Sb(4) | 28(1)           | 29(1)           | 49(1)           | 14(1)           | 1(1)            | 0(1)            |
| Sb(5) | 33(1)           | 33(1)           | 18(1)           | 16(1)           | 0               | 0               |
| Bi(6) | 31(1)           | 31(1)           | 24(1)           | 15(1)           | 0(1)            | 0(1)            |
| Sb(6) | 31(1)           | 31(1)           | 24(1)           | 15(1)           | 0(1)            | 0(1)            |
| Rb(1) | 33(1)           | 33(1)           | 38(2)           | 16(1)           | 0               | 0               |
| Rb(2) | 40(1)           | 40(1)           | 26(1)           | 20(1)           | 0               | 0               |
| Rb(3) | 38(1)           | 38(1)           | 25(1)           | 19(1)           | 0               | 0               |
| Rb(4) | 19(1)           | 21(1)           | 25(1)           | 10(1)           | 2(1)            | 0(1)            |
| Rb(5) | 55(1)           | 28(1)           | 39(1)           | 12(1)           | -2(1)           | 1(1)            |
| Rb(6) | 47(1)           | 67(2)           | 85(2)           | 35(1)           | 4(1)            | -1(1)           |
| Rb(7) | 86(2)           | 86(2)           | 53(2)           | 43(1)           | 0               | 0               |
| Rb(8) | 85(2)           | 85(2)           | 45(2)           | 42(1)           | 0               | 0               |

|        |        |         |        |        |        |        |
|--------|--------|---------|--------|--------|--------|--------|
| Rb(9)  | 99(2)  | 99(2)   | 31(2)  | 49(1)  | 0      | 0      |
| Rb(10) | 115(2) | 140(3)  | 63(2)  | 71(2)  | -2(2)  | -2(2)  |
| Rb(11) | 43(3)  | 49(3)   | 48(2)  | 21(2)  | -5(2)  | -9(2)  |
| Rb(12) | 59(2)  | 60(2)   | 44(2)  | 31(2)  | 2(1)   | 0(1)   |
| Rb(13) | 48(2)  | 49(3)   | 50(2)  | 26(3)  | 1(2)   | 4(2)   |
| Rb(14) | 72(4)  | 72(4)   | 63(5)  | 38(5)  | -2(2)  | 2(2)   |
| Rb(15) | 47(2)  | 47(3)   | 50(2)  | 25(3)  | 2(2)   | -5(2)  |
| Cl(1)  | 26(2)  | 18(2)   | 31(2)  | 8(2)   | 0(2)   | 0(1)   |
| Cl(2)  | 25(2)  | 25(2)   | 28(2)  | 12(2)  | -7(2)  | 1(2)   |
| Cl(3)  | 36(2)  | 75(3)   | 30(2)  | 39(2)  | -6(2)  | 0(2)   |
| Cl(4)  | 32(2)  | 35(2)   | 29(2)  | 8(2)   | 12(2)  | 14(2)  |
| Cl(5)  | 58(2)  | 40(2)   | 36(2)  | 23(2)  | -1(2)  | -12(2) |
| Cl(6)  | 53(2)  | 33(2)   | 28(2)  | 28(2)  | -1(2)  | -14(2) |
| Cl(7)  | 60(2)  | 48(2)   | 38(2)  | 35(2)  | 2(2)   | -9(2)  |
| Cl(8)  | 87(4)  | 189(7)  | 42(2)  | 93(4)  | -29(2) | 4(3)   |
| Cl(9)  | 85(4)  | 187(8)  | 55(3)  | 92(5)  | -22(3) | -4(4)  |
| Cl(10) | 62(3)  | 65(3)   | 73(3)  | 15(3)  | 27(3)  | 24(3)  |
| Cl(11) | 98(4)  | 63(3)   | 72(3)  | 49(3)  | 2(3)   | -23(3) |
| Cl(12) | 58(3)  | 104(4)  | 60(2)  | 49(3)  | -21(2) | 2(3)   |
| Cl(13) | 111(6) | 207(11) | 150(8) | 106(7) | 48(6)  | 8(7)   |
| Cl(14) | 174(9) | 88(5)   | 154(7) | 85(6)  | 9(6)   | 19(5)  |
| Cl(15) | 95(6)  | 90(6)   | 146(7) | 5(4)   | -20(5) | -22(5) |
| Cl(16) | 44(7)  | 41(6)   | 74(8)  | 16(5)  | 10(6)  | -3(6)  |
| Cl(17) | 53(8)  | 96(12)  | 76(10) | 45(9)  | 0(7)   | -2(9)  |
| Cl(18) | 47(7)  | 50(8)   | 79(9)  | 22(6)  | 3(6)   | 6(6)   |
| Cl(19) | 55(8)  | 61(9)   | 70(9)  | 17(7)  | 12(7)  | 14(7)  |
| Cl(20) | 45(7)  | 54(8)   | 82(9)  | 30(7)  | -4(6)  | -10(7) |
| Cl(21) | 60(9)  | 108(14) | 85(11) | 61(10) | 4(8)   | 9(10)  |
| Cl(22) | 47(7)  | 53(7)   | 50(6)  | 18(6)  | -1(6)  | 2(5)   |
| Cl(23) | 49(7)  | 57(7)   | 58(6)  | 29(6)  | -1(6)  | -1(5)  |
| Cl(24) | 60(7)  | 53(7)   | 52(6)  | 33(7)  | -6(5)  | -3(5)  |

The anisotropic displacement factor exponent takes the form:  $-2\pi^2[h^2a^{*2}U_{11} + \dots + 2hka^*b^*U_{12}]$ .

**Note S2. Site relations between  $Rb_{23}Sb^{III}_7Sb^V_2Cl_{54}$  ( $Cmcm$ ) and  $Rb_{23}Bi^{III}_xSb^{III}_{7-x}Sb^V_2Cl_{54}$  ( $R32$ ) structures:**

$Sb_1$  &  $Sb_2$  ( $Cmcm$ ) =>  $Bi/Sb_1$  & disordered  $Bi_6/Sb_6$  ( $R32$ )

$Sb_3$  ( $Cmcm$ ) =>  $Bi_2/Sb_2$ ,  $Bi_3/Sb_3$ , and a portion of mixed III-V site  $Bi_4/Sb_4$  ( $R32$ )

$Sb_4$  ( $Cmcm$ ) =>  $Sb_5$  & a portion of mixed III-V site  $Bi_4/Sb_4$  ( $R32$ )

**Table S16. Octahedral bismuth and antimony sites in  $Rb_{23}Bi^{III}_{2.50}Sb^{III}_{4.50}Sb^V_2Cl_{54}$  ( $x = 2.50$ ,  $R32$ ).**

| Site label       | Wyckoff site | % Sb | Average bond length, (Å) | Distortion index $\Delta d$ | Effective Coord. # | Angle variance | Valence     |
|------------------|--------------|------|--------------------------|-----------------------------|--------------------|----------------|-------------|
| $Bi_1/Sb_1$      | 9d           | 44.9 | 2.694                    | 0.022                       | 5.833              | 16.444         | III         |
| $Bi_2/Sb_2$      | 6c           | 74.5 | 2.678                    | 0.042                       | 5.576              | 5.434          | III         |
| $Bi_3/Sb_3$      | 6c           | 72.0 | 2.679                    | 0.041                       | 5.592              | 5.641          | III         |
| $Bi_4/Sb_4^*$    | 18f          | 92.4 | 2.580                    | 0.033                       | 5.724              | 0.377          | Mixed III,V |
| $Sb_5$           | 6c           | 100  | 2.331                    | 0.000                       | 6.000              | 0.276          | V           |
| $Bi_6/Sb_6^{**}$ | 9e           | 39.6 | 2.673                    | 0.028                       | 5.717**            | Disordered     | III         |

\*mixed III-V, reflected by very large thermal parameters near disordered layer

\*\*rotationally disordered (3-fold), coord # divided by 3

Values for bond lengths, the bond length distortion index  $\Delta d$ , angle variance, and the effective coordination numbers calculated using the Vesta3 crystallography software.<sup>[3]</sup>

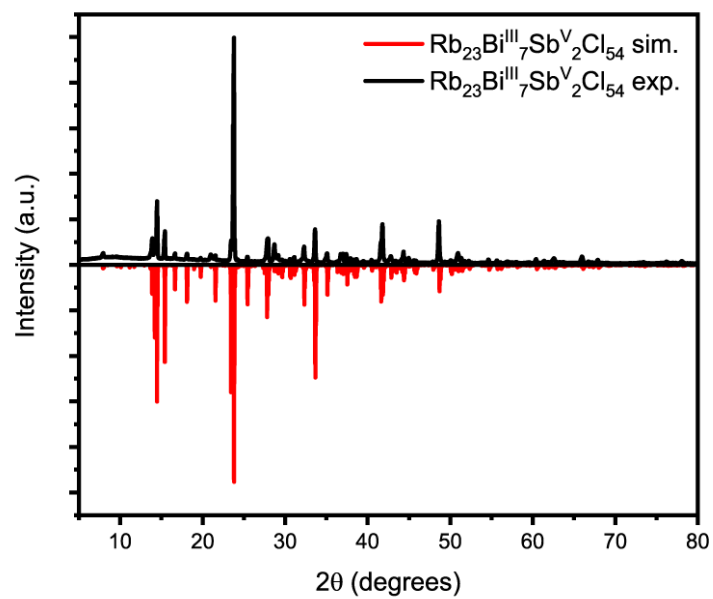

Figure S7. PXR D of  $\text{Rb}_{23}\text{Bi}_{6.97}\text{Sb}_{2.03}\text{Cl}_{54}$ .

**Table S17. Crystal data and structure refinement for Rb<sub>23</sub>Bi<sub>6.62</sub>Sb<sub>2.38</sub>Cl<sub>54</sub> at 298 K.**

|                                |                                                                                      |
|--------------------------------|--------------------------------------------------------------------------------------|
| Empirical formula              | Rb <sub>23</sub> Bi <sub>6.62</sub> Sb <sub>2.38</sub> Cl <sub>54</sub>              |
| Formula weight                 | 5553.61                                                                              |
| Temperature                    | 298 K                                                                                |
| Wavelength                     | 0.71073 Å                                                                            |
| Crystal system                 | Trigonal                                                                             |
| Space group                    | R32                                                                                  |
| Unit cell dimensions           | a = 12.9752(6) Å, α = 90°<br>b = 12.9752(6) Å, β = 90°<br>c = 112.438(8) Å, γ = 120° |
| Volume                         | 16393.5(18) Å <sup>3</sup>                                                           |
| Z                              | 6                                                                                    |
| Density (calculated)           | 3.375 g/cm <sup>3</sup>                                                              |
| Absorption coefficient         | 22.719 mm <sup>-1</sup>                                                              |
| F(000)                         | 14640                                                                                |
| Crystal size                   | 0.27 x 0.24 x 0.05 mm <sup>3</sup>                                                   |
| θ range for data collection    | 1.630 to 31.525°                                                                     |
| Index ranges                   | -18<=h<=18, -18<=k<=19, -160<=l<=156                                                 |
| Reflections collected          | 62871                                                                                |
| Independent reflections        | 11380 [R <sub>int</sub> = 0.0973]                                                    |
| Completeness to θ = 25.242°    | 99.9%                                                                                |
| Refinement method              | Full-matrix least-squares on F <sup>2</sup>                                          |
| Data / restraints / parameters | 11380 / 0 / 341                                                                      |
| Goodness-of-fit                | 1.072                                                                                |
| Final R indices [I > 2σ(I)]    | R <sub>obs</sub> = 0.0864, wR <sub>obs</sub> = 0.2231                                |
| R indices [all data]           | R <sub>all</sub> = 0.1204, wR <sub>all</sub> = 0.2438                                |
| Largest diff. peak and hole    | 6.069 and -3.405 e·Å <sup>-3</sup>                                                   |

$$R = \sum ||F_o| - |F_c|| / \sum |F_o|, wR = \{\sum [w(|F_o|^2 - |F_c|^2)^2] / \sum [w(|F_o|^4)]\}^{1/2} \text{ and } w=1/[\sigma^2(F_o^2) + (0.0973P)^2 + 1152.5934P] \text{ where } P=(F_o^2 + 2F_c^2)/3$$

**Table S18. Atomic coordinates (x10<sup>4</sup>) and equivalent isotropic displacement parameters (Å<sup>2</sup>x10<sup>3</sup>) for Rb<sub>23</sub>Bi<sub>6.62</sub>Sb<sub>2.38</sub>Cl<sub>54</sub> at 298 K with estimated standard deviations in parentheses.**

| Label  | x        | y        | z       | Occupancy | U <sub>eq</sub> <sup>*</sup> |
|--------|----------|----------|---------|-----------|------------------------------|
| Bi(1)  | 10002(1) | 6666.67  | 6666.67 | 1         | 30(1)                        |
| Bi(2)  | 10000    | 10000    | 6102(1) | 1         | 33(1)                        |
| Bi(3)  | 6666.67  | 3333.33  | 6102(1) | 1         | 32(1)                        |
| Bi(4)  | 6679(2)  | 6668(2)  | 5569(1) | 0.541(15) | 48(1)                        |
| Sb(4)  | 6679(2)  | 6668(2)  | 5569(1) | 0.459(15) | 48(1)                        |
| Sb(5)  | 3333.33  | 6666.67  | 6067(1) | 1         | 40(1)                        |
| Bi(6)  | 3332(2)  | 3332(2)  | 5000    | 1         | 48(1)                        |
| Rb(1)  | 13333.33 | 6666.67  | 6666.67 | 1         | 39(2)                        |
| Rb(2)  | 6666.67  | 3333.33  | 6860(1) | 1         | 42(1)                        |
| Rb(3)  | 6666.67  | 3333.33  | 6472(1) | 1         | 42(1)                        |
| Rb(4)  | 6222(2)  | 6669(2)  | 6449(1) | 1         | 30(1)                        |
| Rb(5)  | 9737(3)  | 6668(3)  | 6221(1) | 1         | 56(1)                        |
| Rb(6)  | 6864(3)  | 6666(3)  | 5969(1) | 1         | 81(2)                        |
| Rb(7)  | 10000    | 10000    | 5710(1) | 1         | 92(2)                        |
| Rb(8)  | 6666.67  | 3333.33  | 5710(1) | 1         | 93(2)                        |
| Rb(9)  | 3333.33  | 6666.67  | 5670(1) | 1         | 88(2)                        |
| Rb(10) | 9971(6)  | 6665(6)  | 5442(1) | 1         | 118(2)                       |
| Rb(11) | 9584(13) | 9544(10) | 5216(1) | 0.3333    | 66(3)                        |
| Rb(12) | 6660(5)  | 6676(6)  | 5197(1) | 0.6667    | 75(2)                        |
| Rb(13) | 6670(13) | 3776(10) | 5216(1) | 0.3333    | 61(3)                        |

|        |          |           |         |        |        |
|--------|----------|-----------|---------|--------|--------|
| Rb(14) | 6670(15) | 6670(15)  | 5000    | 0.3333 | 90(6)  |
| Rb(15) | 3781(11) | 6668(13)  | 5216(1) | 0.3333 | 63(3)  |
| Cl(1)  | 8921(6)  | 4251(5)   | 6667(1) | 1      | 38(2)  |
| Cl(2)  | 11446(5) | 6667(5)   | 6485(1) | 1      | 34(2)  |
| Cl(3)  | 8667(7)  | 6676(8)   | 6492(1) | 1      | 53(2)  |
| Cl(4)  | 8113(6)  | 8387(6)   | 6244(1) | 1      | 45(2)  |
| Cl(5)  | 9938(8)  | 8321(8)   | 5967(1) | 1      | 58(2)  |
| Cl(6)  | 6392(6)  | 4948(6)   | 6244(1) | 1      | 47(2)  |
| Cl(7)  | 4988(8)  | 3267(9)   | 5966(1) | 1      | 62(2)  |
| Cl(8)  | 4805(10) | 6661(14)  | 6187(1) | 1      | 95(4)  |
| Cl(9)  | 3344(16) | 5237(12)  | 5947(2) | 1      | 111(5) |
| Cl(10) | 5053(12) | 5048(13)  | 5701(1) | 1      | 87(3)  |
| Cl(11) | 6678(11) | 8278(13)  | 5701(1) | 1      | 86(3)  |
| Cl(12) | 8299(12) | 6667(11)  | 5699(1) | 1      | 80(3)  |
| Cl(13) | 4977(17) | 6660(20)  | 5428(2) | 1      | 145(7) |
| Cl(14) | 6690(20) | 4981(17)  | 5428(2) | 1      | 150(8) |
| Cl(15) | 8379(17) | 8373(17)  | 5429(2) | 1      | 143(7) |
| Cl(16) | 8530(30) | 6630(30)  | 5182(2) | 0.3333 | 70(8)  |
| Cl(17) | 8650(30) | 5290(30)  | 5178(3) | 0.3333 | 81(10) |
| Cl(18) | 6660(30) | 8540(30)  | 5184(2) | 0.3333 | 67(7)  |
| Cl(19) | 8020(30) | 10040(30) | 5178(2) | 0.3333 | 79(10) |
| Cl(20) | 8870(30) | 7950(30)  | 4999(2) | 0.3333 | 65(6)  |
| Cl(21) | 4770(30) | 4760(30)  | 5184(2) | 0.3333 | 62(7)  |

$\bar{U}_{eq}$  is defined as one third of the trace of the orthogonalized  $U_{ij}$  tensor.

**Table S19.** Anisotropic displacement parameters ( $\text{\AA}^2 \times 10^3$ ) for  $\text{Rb}_{23}\text{Bi}_{6.62}\text{Sb}_{2.38}\text{Cl}_{54}$  at 298 K with estimated standard deviations in parentheses.

| Label  | $U_{11}$ | $U_{22}$ | $U_{33}$ | $U_{12}$ | $U_{13}$ | $U_{23}$ |
|--------|----------|----------|----------|----------|----------|----------|
| Bi(1)  | 16(1)    | 18(1)    | 57(1)    | 9(1)     | 0(1)     | 0(1)     |
| Bi(2)  | 30(1)    | 30(1)    | 37(1)    | 15(1)    | 0        | 0        |
| Bi(3)  | 30(1)    | 30(1)    | 37(1)    | 15(1)    | 0        | 0        |
| Bi(4)  | 45(1)    | 46(1)    | 54(2)    | 23(1)    | 1(1)     | 1(1)     |
| Sb(4)  | 45(1)    | 46(1)    | 54(2)    | 23(1)    | 1(1)     | 1(1)     |
| Sb(5)  | 48(1)    | 48(1)    | 25(2)    | 24(1)    | 0        | 0        |
| Bi(6)  | 61(1)    | 61(1)    | 24(1)    | 31(1)    | 0(1)     | 0(1)     |
| Rb(1)  | 29(2)    | 29(2)    | 59(3)    | 14(1)    | 0        | 0        |
| Rb(2)  | 39(2)    | 39(2)    | 47(2)    | 19(1)    | 0        | 0        |
| Rb(3)  | 39(2)    | 39(2)    | 49(2)    | 19(1)    | 0        | 0        |
| Rb(4)  | 22(1)    | 26(1)    | 43(2)    | 12(1)    | 2(1)     | 0(1)     |
| Rb(5)  | 59(2)    | 34(2)    | 66(2)    | 17(2)    | -3(2)    | 2(2)     |
| Rb(6)  | 59(2)    | 86(3)    | 109(4)   | 43(2)    | 6(2)     | 0(2)     |
| Rb(7)  | 101(4)   | 101(4)   | 75(4)    | 51(2)    | 0        | 0        |
| Rb(8)  | 105(4)   | 105(4)   | 68(4)    | 53(2)    | 0        | 0        |
| Rb(9)  | 106(4)   | 106(4)   | 52(3)    | 53(2)    | 0        | 0        |
| Rb(10) | 134(5)   | 169(6)   | 58(3)    | 82(4)    | 0(3)     | -1(3)    |
| Rb(11) | 83(12)   | 67(8)    | 48(4)    | 37(6)    | -6(5)    | -3(4)    |
| Rb(12) | 90(4)    | 100(5)   | 37(2)    | 49(4)    | 2(2)     | 0(2)     |
| Rb(13) | 63(6)    | 66(8)    | 53(4)    | 32(7)    | -5(5)    | -2(4)    |
| Rb(14) | 106(11)  | 106(11)  | 49(8)    | 47(12)   | -8(5)    | 8(5)     |
| Rb(15) | 75(9)    | 63(6)    | 49(4)    | 33(8)    | 2(4)     | 1(5)     |
| Cl(1)  | 33(3)    | 21(2)    | 55(3)    | 10(2)    | -3(3)    | 1(2)     |
| Cl(2)  | 24(3)    | 27(2)    | 50(3)    | 12(2)    | 8(2)     | 1(2)     |
| Cl(3)  | 40(3)    | 80(5)    | 54(4)    | 40(4)    | -10(3)   | 3(4)     |



|        |         |         |         |         |        |        |
|--------|---------|---------|---------|---------|--------|--------|
| Cl(4)  | 31(3)   | 38(3)   | 56(4)   | 10(2)   | 12(3)  | 15(3)  |
| Cl(5)  | 73(5)   | 46(4)   | 63(5)   | 36(4)   | -3(4)  | -18(4) |
| Cl(6)  | 52(4)   | 38(3)   | 61(4)   | 30(3)   | -3(3)  | -17(3) |
| Cl(7)  | 46(4)   | 76(5)   | 64(5)   | 31(4)   | -16(4) | -2(4)  |
| Cl(8)  | 79(7)   | 177(12) | 53(5)   | 82(8)   | -24(5) | 2(6)   |
| Cl(9)  | 201(15) | 91(9)   | 83(7)   | 105(10) | 4(8)   | -20(6) |
| Cl(10) | 79(7)   | 97(9)   | 68(5)   | 32(6)   | 17(6)  | 15(6)  |
| Cl(11) | 106(8)  | 88(8)   | 70(5)   | 53(7)   | 3(5)   | -24(6) |
| Cl(12) | 79(7)   | 104(8)  | 69(5)   | 54(7)   | -20(6) | 0(5)   |
| Cl(13) | 131(14) | 250(20) | 101(10) | 128(16) | 29(9)  | 2(12)  |
| Cl(14) | 230(20) | 119(13) | 131(13) | 113(16) | 2(13)  | 11(10) |
| Cl(15) | 128(14) | 125(14) | 102(10) | 8(10)   | 0(10)  | -8(9)  |
| Cl(16) | 80(20)  | 74(17)  | 35(11)  | 28(15)  | 0(11)  | -1(10) |
| Cl(17) | 80(20)  | 63(17)  | 65(18)  | 7(15)   | -7(14) | -8(13) |
| Cl(18) | 69(17)  | 70(18)  | 51(13)  | 28(14)  | -3(11) | -4(12) |
| Cl(19) | 76(19)  | 140(30) | 47(14)  | 70(20)  | 14(13) | -6(16) |
| Cl(20) | 80(17)  | 88(19)  | 45(10)  | 56(17)  | 4(12)  | 2(11)  |
| Cl(21) | 80(19)  | 67(17)  | 41(11)  | 38(16)  | -3(11) | -1(10) |

The anisotropic displacement factor exponent takes the form:  $-2\pi^2[h^2a^{*2}U_{11} + \dots + 2hka^*b^*U_{12}]$ .

**Table S20.** Selected bond lengths [Å] for  $\text{Rb}_{23}\text{Bi}_{6.62}\text{Sb}_{2.38}\text{Cl}_{54}$  at 298 K with estimated standard deviations in parentheses.

| Label           | Distances |
|-----------------|-----------|
| Bi(1)-Cl(1)     | 2.719(5)  |
| Bi(1)-Cl(2)     | 2.775(6)  |
| Bi(1)-Cl(3)     | 2.622(7)  |
| Bi(2)-Cl(4)     | 2.788(7)  |
| Bi(2)-Cl(5)     | 2.625(8)  |
| Bi(3)-Cl(6)     | 2.791(6)  |
| Bi(3)-Cl(7)     | 2.626(9)  |
| Bi(4)-Cl(10)    | 2.577(13) |
| Bi(4)-Cl(11)    | 2.566(12) |
| Bi(4)-Cl(12)    | 2.560(11) |
| Bi(4)-Cl(13)    | 2.714(19) |
| Bi(4)-Cl(14)    | 2.703(19) |
| Bi(4)-Cl(15)    | 2.712(18) |
| Sb(4)-Cl(10)    | 2.577(13) |
| Sb(4)-Cl(11)    | 2.566(12) |
| Sb(4)-Cl(12)    | 2.560(11) |
| Sb(4)-Cl(13)    | 2.714(19) |
| Sb(4)-Cl(14)    | 2.703(19) |
| Sb(4)-Cl(15)    | 2.712(18) |
| Sb(5)-Cl(8)     | 2.342(8)  |
| Sb(5)-Cl(9)     | 2.301(10) |
| Bi(6)-Cl(17)#6  | 2.68(3)   |
| Bi(6)-Cl(19)#10 | 2.64(3)   |
| Bi(6)-Cl(20)#6  | 2.71(3)   |
| Bi(6)-Cl(22)#10 | 2.70(3)   |
| Bi(6)-Cl(23)    | 2.75(3)   |
| Bi(6)-Cl(24)    | 2.64(3)   |

Symmetry transformations used to generate equivalent atoms:

(1)  $x-y+2/3, -y+1/3, -z+1/3$  (2)  $y+2/3, x+1/3, -z+1/3$  (3)  $-x+y+1, -x+2, z$  (4)  $-y+2, x-y+1, z$  (5)  $-x+y+1, -x+1, z$  (6)  $-y+1, x-y, z$  (7)  $-y+1, x-y+1, z$  (8)  $-x+y, -x+1, z$  (9)  $x-y, -y+1, -z+1$  (10)  $-x+1, -x+y, -z+1$  (11)  $y, x, -z+1$  (12)  $x-y+2/3, -y+1/3, -z+1/3$  (13)  $-x+2/3, -x+y+1/3, -z+1/3$  (14)  $-x+y+2, -x+2, z$  (15)  $y+2/3, x+1/3, -z+1/3$  (16)  $-x+2/3, -x+y+1/3, -z+1/3$  (17)  $-y+2, x-y, z$  (18)  $y+2/3, x+1/3, -z+1/3$  (19)  $-x+2/3, -x+y+1/3, -z+1/3$  (20)  $-x+2, -x+y+1, -z+1$  (21)  $x-y+1, -y+1, -z+1$  (22)  $x-1, y, z$  (23)  $-x+1, -x+y+1, -z+1$

**Table S21. Octahedral bismuth and antimony sites in  $\text{Rb}_{23}\text{Bi}^{\text{III}}_{6.62}\text{Sb}^{\text{III}}_{0.38}\text{Sb}^{\text{V}}_2\text{Cl}_{54}$  ( $x = 6.62$ ,  $R_{32}$ ).**

| Site label | Wyckoff site | % Sb | Average bond length, ( $\text{\AA}$ ) | Distortion index $\Delta d$ | Effective Coord. # | Angle variance | Valence     |
|------------|--------------|------|---------------------------------------|-----------------------------|--------------------|----------------|-------------|
| Bi1        | 9d           | 0    | 2.7057                                | 0.020                       | 5.870              | 17.280         | III         |
| Bi2        | 6c           | 0    | 2.706                                 | 0.030                       | 5.788              | 6.474          | III         |
| Bi3        | 6c           | 0    | 2.709                                 | 0.030                       | 5.781              | 6.194          | III         |
| Bi4/Sb4*   | 18f          | 45.9 | 2.638                                 | 0.027                       | 5.830              | 0.155          | Mixed III,V |
| Sb5        | 6c           | 100  | 2.322                                 | 0.009                       | 5.984              | 0.480          | V           |
| Bi6**      | 9e           | 0    | 2.720                                 | 0.019                       | 5.893**            | Disordered     | III         |

\*mixed III-V, reflected by very large thermal parameters near disordered layer

\*\*rotationally disordered (3-fold), coord # divided by 3

Values for bond lengths, the bond length distortion index  $\Delta d$ , angle variance, and the effective coordination numbers calculated using the Vesta3 crystallography software.<sup>[3]</sup>

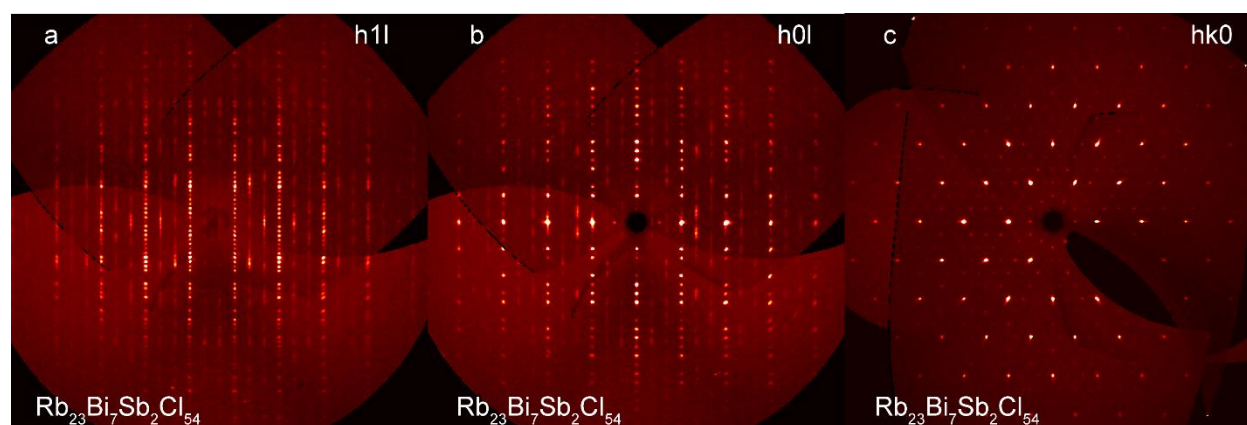

**Figure S8. Unwrapped images from the diffraction experiment for  $\text{Rb}_{23}\text{Bi}_7\text{Sb}_2\text{Cl}_{54}$ . Panels a and b demonstrate the presence of diffuse scattering indicative of disorder in the structure.**

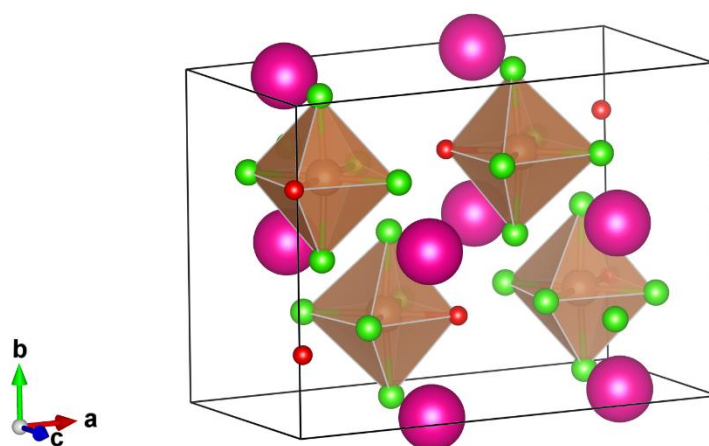

**Figure S9. Unit cell of  $\text{Rb}_2\text{SbCl}_5\text{O}$ .**

**Table S22. Crystal data and structure refinement for Rb<sub>2</sub>SbCl<sub>5</sub>O at 300 K.**

|                                |                                                                                    |
|--------------------------------|------------------------------------------------------------------------------------|
| Empirical formula              | Rb <sub>2</sub> SbCl <sub>5</sub> O                                                |
| Formula weight                 | 485.94                                                                             |
| Temperature                    | 300 K                                                                              |
| Wavelength                     | 0.71073 Å                                                                          |
| Crystal system                 | Orthorhombic                                                                       |
| Space group                    | <i>Pnma</i>                                                                        |
| Unit cell dimensions           | a = 14.0332(6) Å, α = 90°<br>b = 10.1091(4) Å, β = 90°<br>c = 7.2292(3) Å, γ = 90° |
| Volume                         | 1025.56(7) Å <sup>3</sup>                                                          |
| Z                              | 4                                                                                  |
| Density (calculated)           | 3.147 g/cm <sup>3</sup>                                                            |
| Absorption coefficient         | 13.356 mm <sup>-1</sup>                                                            |
| F(000)                         | 872                                                                                |
| Crystal size                   | 0.22 x 0.18 x 0.03 mm <sup>3</sup>                                                 |
| θ range for data collection    | 2.903 to 31.520°                                                                   |
| Index ranges                   | -20 ≤ h ≤ 20, -14 ≤ k ≤ 14, -10 ≤ l ≤ 10                                           |
| Reflections collected          | 11208                                                                              |
| Independent reflections        | 1694 [R <sub>int</sub> = 0.0415]                                                   |
| Completeness to θ = 25.242°    | 100%                                                                               |
| Refinement method              | Full-matrix least-squares on F <sup>2</sup>                                        |
| Data / restraints / parameters | 1694 / 0 / 49                                                                      |
| Goodness-of-fit                | 1.171                                                                              |
| Final R indices [I > 2σ(I)]    | R <sub>obs</sub> = 0.0389, wR <sub>obs</sub> = 0.0896                              |
| R indices [all data]           | R <sub>all</sub> = 0.0443, wR <sub>all</sub> = 0.0930                              |
| Largest diff. peak and hole    | 1.503 and -0.908 e·Å <sup>-3</sup>                                                 |

$$R = \sum ||F_o| - |F_c|| / \sum |F_o|, wR = \{ \sum [w(|F_o|^2 - |F_c|^2)^2] / \sum [w(|F_o|^4)] \}^{1/2} \text{ and } w = 1 / [ \sigma^2(F_o^2) + (0.0408P)^2 + 3.5645P ] \text{ where } P = (F_o^2 + 2F_c^2) / 3$$

**Table S23. Atomic coordinates (x10<sup>4</sup>) and equivalent isotropic displacement parameters (Å<sup>2</sup>x10<sup>3</sup>) for Rb<sub>2</sub>SbCl<sub>5</sub>O at 300 K with estimated standard deviations in parentheses.**

| Label  | x       | y       | z       | Occupancy | U <sub>eq</sub> <sup>*</sup> |
|--------|---------|---------|---------|-----------|------------------------------|
| Sb(01) | 6146(1) | 7500    | 6911(1) | 1         | 23(1)                        |
| Rb(02) | 6444(1) | 5008(1) | 1557(1) | 1         | 37(1)                        |
| Cl(03) | 7525(2) | 7500    | 9041(2) | 1         | 28(1)                        |
| Cl(04) | 7227(2) | 7500    | 4226(2) | 1         | 36(1)                        |
| Cl(05) | 6037(1) | 5037(1) | 6795(2) | 1         | 34(1)                        |
| Cl(06) | 5026(2) | 7500    | 9570(2) | 1         | 34(1)                        |
| O(07)  | 4905(4) | 7500    | 4928(8) | 1         | 40(2)                        |

\*U<sub>eq</sub> is defined as one third of the trace of the orthogonalized U<sub>ij</sub> tensor.

**Table S24. Anisotropic displacement parameters (Å<sup>2</sup>x10<sup>3</sup>) for Rb<sub>2</sub>SbCl<sub>5</sub>O at 300 K with estimated standard deviations in parentheses.**

| Label  | U <sub>11</sub> | U <sub>22</sub> | U <sub>33</sub> | U <sub>12</sub> | U <sub>13</sub> | U <sub>23</sub> |
|--------|-----------------|-----------------|-----------------|-----------------|-----------------|-----------------|
| Sb(01) | 23(1)           | 20(1)           | 26(1)           | 0               | -2(1)           | 0               |
| Rb(02) | 36(1)           | 35(1)           | 40(1)           | -1(1)           | -5(1)           | 4(1)            |
| Cl(03) | 26(1)           | 33(1)           | 27(1)           | 0               | -6(1)           | 0               |

|        |       |       |       |      |        |       |
|--------|-------|-------|-------|------|--------|-------|
| Cl(04) | 40(1) | 43(1) | 25(1) | o    | 8(1)   | o     |
| Cl(05) | 40(1) | 18(1) | 45(1) | o(1) | -9(1)  | -3(1) |
| Cl(06) | 29(1) | 34(1) | 38(1) | o    | 10(1)  | o     |
| O(07)  | 36(3) | 28(2) | 57(3) | o    | -26(3) | o     |

The anisotropic displacement factor exponent takes the form:  $-2\pi^2[h^2a^2U_{11} + \dots + 2hka^*b^*U_{12}]$ .

**Table S25. Bond lengths [Å] for Rb<sub>2</sub>SbCl<sub>5</sub>O at 300 K with estimated standard deviations in parentheses.**

| Label           | Distances  |
|-----------------|------------|
| Sb(01)-Cl(03)   | 2.4727(15) |
| Sb(01)-Cl(04)   | 2.4632(17) |
| Sb(01)-Cl(05)#5 | 2.4956(11) |
| Sb(01)-Cl(05)   | 2.4956(11) |
| Sb(01)-Cl(06)   | 2.4836(16) |
| Sb(01)-O(07)    | 2.255(5)   |

Symmetry transformations used to generate equivalent atoms:

(1)  $-x+3/2, -y+1, z+1/2$  (2)  $-x+3/2, y+1/2, z+1/2$  (3)  $x, y, z+1$  (4)  $x, -y+3/2, z+1$  (5)  $x, -y+3/2, z$  (6)  $-x+3/2, -y+1, z-1/2$  (7)  $x, y, z-1$  (8)  $-x+1, -y+1, -z+1$  (9)  $-x+1, y+1/2, -z+1$

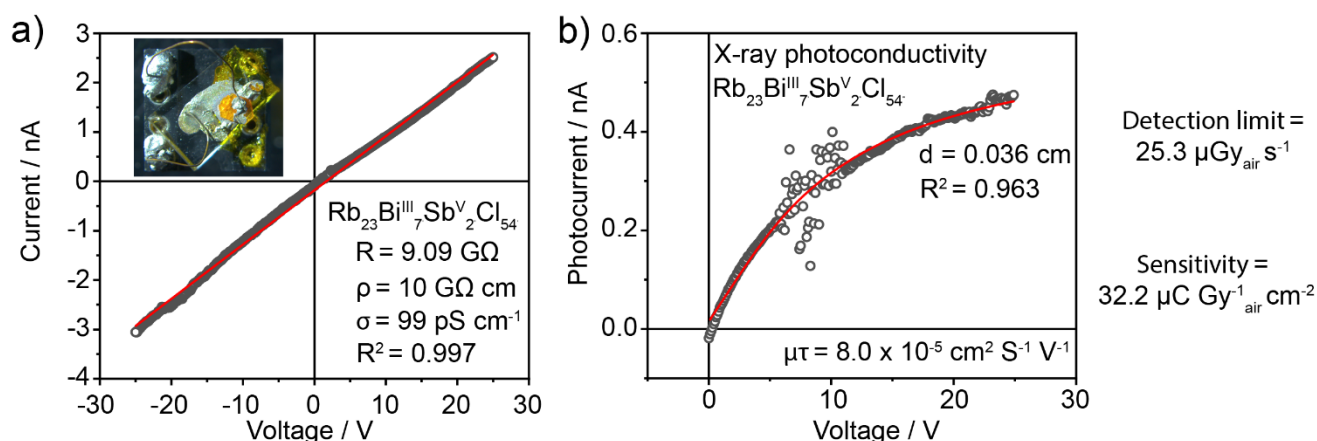

**Figure S10. Electrical properties. a) I-V characterization of Rb<sub>23</sub>Bi<sub>7</sub>Sb<sub>2</sub>Cl<sub>54</sub>; inset: image of device with orange crystal, b) X-ray photoconductivity (with dark current subtracted) measured on a crystal with thickness  $d = 0.036$  cm. Detection limit and sensitivity are reported at an applied voltage of 40 kV.**

## References

- [1] G. M. Sheldrick, *Acta Crystallogr A* **2008**, *64*, 112-122.
- [2] O. V. Dolomanov, L. J. Bourhis, R. J. Gildea, J. A. K. Howard, H. Puschmann, *J. Appl. Crystallogr.* **2009**, *42*, 339-341.
- [3] K. Momma, F. Izumi, *J. Appl. Crystallogr.* **2011**, *44*, 1272-1276.
- [4] H. Putz, K. Brandenburg, *Crystal Impact-GbR, Kreuzherrenstr* **2006**, *102*, 53227.
- [5] L. Atkinson, P. Day, *J. Chem. Soc. A* **1969**, 2432-2436.
- [6] M. L. Hackert, S. L. Lawton, R. A. Jacobson, *Proc. Iowa Acad. Sci.* **1968**, 75.
